# Supplementary material for: Diagnostic accuracy of code-free deep learning for detection and evaluation of posterior capsule opacification
Source: HighWire-hosted journal article supplement (doi:10.1136/bmjophth-2022-000992), 2022-05-01
Supplement: bmjophth-2022-000992supp001_data_supplement.pdf [file bmjophth-2022-000992supp001_data_supplement.pdf]

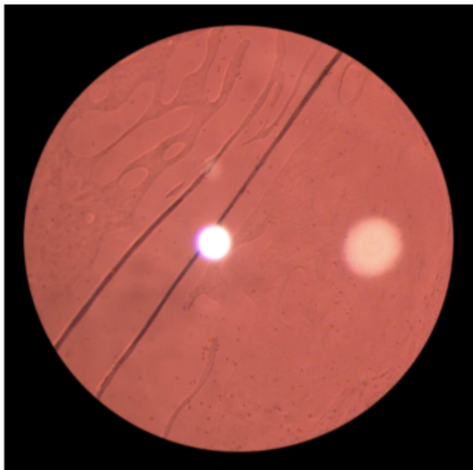

GT Significant - majority vote  
Prediction: Non-significant  
7.316.023
